# Supplementary material for: Mapping humidity-dependent mechanical properties of a single cellulose fibre
Source: Springer Nature journal article supplement (doi:10.1007/s10570-021-04058-4), 2021-07-14
Supplement: MOESM1 [file 10570_2021_4058_MOESM1_ESM.docx]

**Supplementary information to:**

**Mapping Humidity-dependent Mechanical Properties of a Single Cellulose Fibre**

Julia Auernhammer1, Tom Keil2, Binbin Lin3, Jan-Lukas Schäfer4, Bai-Xiang Xu3, Markus Biesalski4 and Robert W. Stark1*

1 Technical University of Darmstadt, Institute of Materials Science, Physics of Surfaces, Alarich-Weiss-Str. 16, 64287 Darmstadt, Germany

2 Technical University of Darmstadt, Institute of Materials Science, Physical Metallurgy, Alarich-Weiss-Str. 2, 64287 Darmstadt, Germany

3 Technical University of Darmstadt, Institute of Materials Science, Mechanics of Functional Materials, Alarich-Weiss-Str. 16, 64287 Darmstadt, Germany

4Technical University of Darmstadt, Department of Chemistry, Macromolecular Chemistry and Paper Chemistry, and Center of Smart Interfaces (CSI), Petersenstraße 22, 64287 Darmstadt, Germany

*corresponding author

1. **Supplementary Table**

Table S1: Information of the used Linters fibre

| Fiber length  (Weightage to mass) | 1.13 mm |
| --- | --- |
| Fibre width | 16. 5 µm |
| Curl | 12.87 % |
| Coarseness | 0.09 mg/m |
| FinesA | 19.55 % |
| Fibrillation | 1.78 % |

1. **Supplementary Figures**

Figure S1: Use of different glues and imbibition of the glue into the fibre. a) Entire fibre, both ends fixed with the glue. No glue has been soaked into the fibre. b) Closeup of the fibre structure. c) Here a glue has been soaked into the fibre.


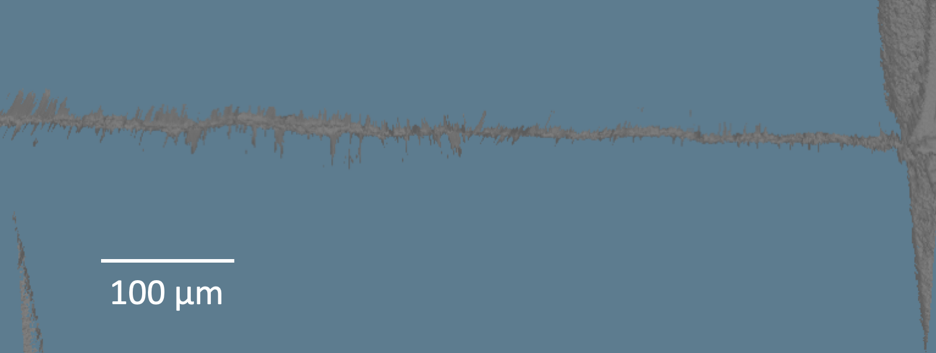


Figure S2: CLSM three-dimensional representation of the investigated paper fibre.

1. **Strategy for calculation the eccentricity**

This strategy is extracted from (Barber et al. 2018).

For a detailed insight into the Hetzian Contact Calculations see Chapter 3 in this book!

Profiles of the contacting should be known

1. **Use equation to determine A and B**

(S1)

*Rx* and *Ry* are the principal radii of curvature of the surface.

With

(S2)

And

(S3)

1. **Read out *e* from the graph**

**
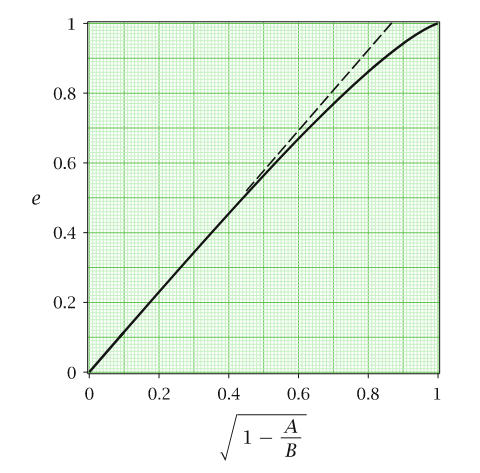
**

Figure S3: Eccentricity *e* of the contact area as a function of . From (Barber et al. 2018).

1. **Read out the elliptical integrals K(e) and E(e)**


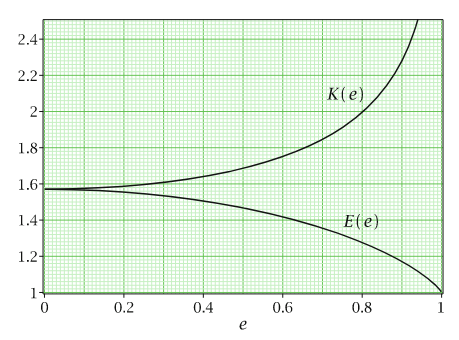


Figure S4: The complete elliptic integrals *K(e),* *E(e)* as functions of eccentricity *e*. From (Barber et al. 2018).

1. **Calculate the ellipse major and minor axis *a* and *b***

(S4)

(S5)

*P* is the applied force.

1. **Repeat**

- Repeat these steps for every bending point and every applied force.
- Thus, one gets out elliptical contact areas for every applied force and every fibre surface curvature.

For an example calculation see (Barber et al. 2018), chapter 3, page 37-38.

Figure S5: Typical DMT modulus maps in a-d) for 2%, 40%, 75% and 90% RH. e) Typical cross sections across a-d) highlighting the reduced stiffness variation in c) and d), i.e. for 75% and 90% RH.

1. **Determination of virtual Young’s moduli**

With Hooke’s law, the Young’s modulus can be determined in the linear elastic area. The calculated Young’s moduli for every RH in the three ROIs are shown in table 1. In opposite to the literature, we extract the Young’s modulus not for the whole fibre, but in sections of the fibre. Additionally, in our contact model we assume a conformal contact between colloidal probe and fibre and a homogeneous fibre material. Thus, the Young’s modulus values display a measure for the fibre stiffness in a certain ROI on the fibre and cannot be treated as absolute values.

Table S3: Corresponding virtual Young’s moduli of ROIs I, II, and III of figure 10.

| **RH (%)** | **E (GPa) ROI I** | **E (GPa) ROI II** | **E (GPa) ROI III** |
| --- | --- | --- | --- |
| 2 | 32 ± 8 | 93 ± 28 | 95 ± 27 |
| 40 | 28 ± 7 | 72 ± 20 | 51 ± 13 |
| 75 | 10 ± 4 | 49 ± 10 | 25 ± 5 |
| 90 | 2 ± 2 | 19 ± 3 | 20 ± 4 |

The virtual Young’s moduli in ROI I exhibited lower values than those in ROIs II and III (Table I). Typical values for the Young’s modulus for plant-based cellulose are 20-80 GPa but can also amount to 138 GPa for highly crystalline cellulose (Cabrera et al. 2011; Eichhorn and Young 2001; Groom et al. 2002; Jayne 1959; Kolln et al. 2005; Lorbach et al. 2014; Nishino et al. 1995; Page et al. 1977). Furthermore, the Young’s modulus is dependent on geometrical aspects, such as cell wall thickness or fibre width.

In figure 9, the corresponding SE images of the ROIs are shown.

ROI I exhibited a larger diameter and thus had a high fibre mass, which is mostly represented by the S2 wall. The S2 wall is mainly responsible for the mechanical properties (Mather and Wardman 2015; Sctostak 2009). Also, the surface in ROI I showed an unordered macroscopic fibril orientation. In ROIs II and III, the SE images in figure 9 show smaller diameters and an ordered macroscopic fibril orientation on the surface. This observation could support the fact that the fibre mass (corresponding the mass of S2 layer) plays a role in the stiffness of a fibre. Furthermore, the order and arrangement of the microscopic fibrils on the surface could be an indicator of the mechanical strength of the fibre. Additionally, with respect to the mechanics, it seems reasonable that unordered macroscopic fibrils are indicative of a reduced local stiffness of the fibre.

All values of the Young’s moduli in table 1 decreased with increasing RH. This is also stated in with reports in the literature (Czibula et al. 2019; Ganser et al. 2015; Hellwig et al. 2018; Placet et al. 2012; Salmen and Back 1980). The values of table S3 were normalised to the Young’s modulus values of 2 % and plotted in figure S6. From figure S6, it is clear that all normalised Young’s moduli from the different ROIs decreased to the same range of values at 90 % RH. In ROI I, the normalised Young’s moduli decreased to 0.21, 0.20 in ROI II, and 0.22 in ROI III. This means that we observed a decrease in the Young’s moduli of 6-7 times from the initial value at 2 % RH. As we did not immerse the fibre in water to cause a drop of 10-100 times the Young’s moduli and obtain values in the kPa range as (Hellwig et al. 2018), we think a decrease of 6-7 times at 90 % RH aligns with (Czibula et al. 2019).

Figure S6: Young’s modulus (normalised to the modulus at RH = 2 %) versus the RH for ROIs I-III.

1. **Repeatability of measurement**

Figure S7: The first cycle of changing the RH is on the left side and the second cycle on the right. a), b) displays the bending at 500 nN, c), d) at 1000 nN, e), f) at 1500 nN and g), h) at 2000 nN. The blue lines are at 2 %, red at 40 %, green at 75 % and black at 90 % RH.

Figure S8: Bending along the longitudinal direction of the fibre at different RHs in both cycles. a) at 2 % RH, b) at 40 % RH, c) at 75 % RH and d) at 90 % RH. The first cycle is plotted in solid lines and the second cycle in dashed lines.

1. **MATLAB Code**

Please note:

The code of the determination of the contact point is from the Bruker Matlab Toolbox (Bruker, Santa Barbara, USA).

**Determination of contact point**

**Find Contact Point: MATLAB CODE**

function [contactPointIndex] = FindContactPoint(xData, yData)

% Finds intersection point of the curve and line connected the first and last point.

% curveStartIndex, contactPointIndex andcurveEndIndex are 0 if no intersection exists.

%

% Example

curveStartIndex = 0;

contactPointIndex = 0;

curveEndIndex = 0;

xSize = max(size(xData));

ySize = max(size(yData));

%if(xSize == ySize)

%Method for contact point is subtract the line connected the first and last point from all points in the curve, and use the lowest point

slope = (yData(ySize) - yData(1)) / (xData(xSize) - xData(1));

minY = 0;

for i = 1:ySize

yVal = yData(i) - slope * xData(i);

if (i == 1 || yVal < minY )

minY = yVal;

contactPointIndex = i;

end

end

%Determine direction of curve. Method assumes end of the contact region is higher that the non-contact region

if (yData(1)> yData(ySize))

curveStartIndex = ySize;

curveEndIndex = 1;

else

curveStartIndex = 1;

curveEndIndex = ySize;

end;

%Method is find highest point after contact point

if curveEndIndex > contactPointIndex

increment = 1;

else

increment = -1;

end

maxY = 0;

i = contactPointIndex + increment;

while i * increment <= curveEndIndex * increment

if yData(i) > maxY

maxY = yData(i);

end

i = i + increment;

end

targetMaxY = (maxY - yData(contactPointIndex)) + yData(contactPointIndex);

maxIndex = contactPointIndex;

i= contactPointIndex + increment;

while i * increment <= curveEndIndex * increment

if (yData(i) > targetMaxY)

break;

end

maxIndex = i;

i = i + increment;

end

curveEndIndex = maxIndex;

end

**References**

Barber JR, Arbor A, A. K (2018) Contact Mechanics - Solid Mechanics and Its Applications Springer Verlag 250 doi:<https://doi.org/10.1007/978-3-319-70939-0>

Cabrera RQ, Meersman F, McMillan PF, Dmitriev V (2011) Nanomechanical and Structural Properties of Native Cellulose Under Compressive Stress Biomacromolecules 12:2178-2183 doi:10.1021/bm200253h

Czibula C, Ganser C, Seidlhofer T, Teichert C, Hirn U (2019) Transverse viscoelastic properties of pulp fibers investigated with an atomic force microscopy method J Mater Sci 54:11448-11461 doi:10.1007/s10853-019-03707-1

Eichhorn SJ, Young RJ (2001) The Young's modulus of a microcrystalline cellulose Cellulose 8:197-207 doi:Doi 10.1023/A:1013181804540

Ganser C, Kreiml P, Morak R, Weber F, Paris O, Schennach R, Teichert C (2015) The effects of water uptake on mechanical properties of viscose fibers Cellulose 22:2777-2786 doi:10.1007/s10570-015-0666-3

Groom L, Mott L, Shaler S (2002) Mechanical properties of individual southern pine fibers. Part I. Determination and variability of stress-strain curves with respect to tree height and juvenility Wood Fiber Sci 34:14-27

Hellwig J, Duran VL, Pettersson T (2018) Measuring elasticity of wet cellulose fibres with AFM using indentation and a linearized Hertz model Anal Methods 10:5 doi:10.1039/c8ay00816g

Jayne BA (1959) Mechanische Eigenschaften von Holzfaser Tappi J 42:416-467

Kolln K, Grotkopp I, Burghammer M, Roth SV, Funari SS, Dommach M, Muller M (2005) Mechanical properties of cellulose fibres and wood. Orientational aspects in situ investigated with synchrotron radiation J Synchrot Radiat 12:739-744 doi:10.1107/s0909049505011714

Lorbach C, Fischer WJ, Gregorova A, Hirn U, Bauer W (2014) Pulp Fiber Bending Stiffness in Wet and Dry State Measured from Moment of Inertia and Modulus of Elasticity BioResources 9:5511-5528

Mather RR, Wardman RH (2015) The chemistry of textile fibres. Royal Society of Chemistry,

Nishino T, Takano K, Nakamae K, Saitaka K, Itakura S, Azuma J, Okamura K (1995) Elastic-modulus of the crystalline regions of cellulose triesters J Polym Sci Pt B-Polym Phys 33:611-618 doi:10.1002/polb.1995.090330411

Page DH, Elhosseiny F, Winkler K, Lancaster APS (1977) Elastic-modulus of sible wood pulp fibres Tappi 60:114-117

Placet V, Cisse O, Boubakar ML (2012) Influence of environmental relative humidity on the tensile and rotational behaviour of hemp fibres J Mater Sci 47:3435-3446 doi:10.1007/s10853-011-6191-3

Salmen NL, Back EL (1980) Moisture-dependent thermal softening of paper, evaluated by its elastic-modulus Tappi 63:117-120

Sctostak A (2009) Cotton Linters: An Alernative Cellulosic Raw Material. WILEY-VCH Verlag GmbH & Co.KGaA, Weinheim,
